# Supplementary material for: Submarine melt rates and mass balance for Greenland's remainingice tongues
Source: Copernicus journal article supplement (doi:10.5194/tc-2017-99), 2017-06-27
Supplement: Supplementary file [file tc-2017-99-AC1-supplement.pdf]

Table 1: List of all WorldView scene pairs used to construct DEMs

| Scene 1          | Scene 2          | Acquisition date | Ice tongue |
|------------------|------------------|------------------|------------|
| 103001000A38B000 | 103001000A50E700 | 2011-04-05       | 79N        |
| 103001000A219600 | 103001000A728C00 | 2011-04-05       | 79N        |
| 103001000A229F00 | 1030010009153100 | 2011-04-07       | PG         |
| 103001000AD56900 | 103001000A1B0E00 | 2011-04-07       | PG         |
| 103001000A878400 | 10300100099B7A00 | 2011-04-11       | 79N        |
| 103001000AC52800 | 103001000A8BD400 | 2011-04-11       | 79N        |
| 1020010012AEC700 | 102001001070E000 | 2011-04-11       | 79N        |
| 103001000A95A600 | 103001000A626900 | 2011-04-11       | PG         |
| 103001000A010200 | 103001000A49BF00 | 2011-04-11       | PG         |
| 1030010009B82900 | 103001000A704F00 | 2011-04-12       | PG         |
| 103001000A6ACB00 | 103001000A961E00 | 2011-04-12       | PG         |
| 103001000AC59500 | 103001000A904D00 | 2011-04-12       | PG         |
| 10200100116D3400 | 102001001201DD00 | 2011-04-26       | 79N        |
| 1020010013B66C00 | 102001001223E500 | 2011-04-26       | 79N        |
| 102001001337A800 | 1020010013E1B900 | 2011-05-31       | 79N        |
| 1020010013738000 | 1020010013A86F00 | 2011-06-01       | 79N        |
| 103001000B826F00 | 103001000B2A4400 | 2011-06-01       | PG         |
| 102001001458A400 | 1020010014460500 | 2011-06-08       | 79N        |
| 1020010012842600 | 102001001331F400 | 2011-06-08       | 79N        |
| 103001000B05D700 | 103001000B5C1D00 | 2011-06-09       | 79N        |
| 103001000BD86D00 | 103001000B9F0B00 | 2011-06-11       | PG         |
| 103001000BBD3F00 | 103001000B71F500 | 2011-06-11       | PG         |
| 103001000B065200 | 103001000B9FF600 | 2011-06-12       | PG         |
| 103001000B966D00 | 103001000A493A00 | 2011-06-12       | PG         |
| 103001000BC5F600 | 103001000B983F00 | 2011-06-12       | PG         |
| 1020010013B98000 | 1020010012DFD600 | 2011-06-13       | PG         |
| 1020010014644A00 | 1020010014B06A00 | 2011-06-18       | PG         |
| 10200100145E7300 | 1020010015B4C600 | 2011-07-11       | PG         |
| 103001000CCDB200 | 103001000BCC5000 | 2011-07-12       | PG         |
| 103001000C1FFB00 | 103001000CC61200 | 2011-07-12       | PG         |
| 1020010013759900 | 10200100140A9400 | 2011-07-15       | PG         |
| 1020010015509A00 | 1020010014C80C00 | 2011-07-16       | 79N        |
| 1020010014C66E00 | 1020010013D73300 | 2011-07-17       | 79N        |
| 102001001548DA00 | 1020010015CB3500 | 2011-08-25       | 79N        |
| 10200100151B8600 | 10200100155F2700 | 2011-08-25       | 79N        |
| 1020010019D4EC00 | 102001001908B300 | 2012-03-17       | 79N        |
| 1030010012838700 | 1030010012AD8300 | 2012-03-26       | PG         |
| 103001001234D500 | 1030010012A50A00 | 2012-04-17       | PG         |
| 10300100129CAA00 | 1030010013D28E00 | 2012-04-17       | 79N        |
| 1030010012816700 | 1030010013109E00 | 2012-04-17       | 79N        |
| 102001001AC08300 | 102001001AE14F00 | 2012-04-19       | PG         |
| 1030010017442400 | 1030010017B34300 | 2012-04-27       | 79N        |

| Scene 1          | Scene 2          | Acquisition date | Ice tongue |
|------------------|------------------|------------------|------------|
| 10200100198A9500 | 1020010018D64700 | 2012-04-30       | 79N        |
| 10300100197E1400 | 1030010018054500 | 2012-05-10       | RG         |
| 10300100187D6D00 | 10300100186FC200 | 2012-05-10       | RG         |
| 1030010019089A00 | 10300100188E8E00 | 2012-05-10       | RG         |
| 102001001B90E400 | 102001001BC6F900 | 2012-05-10       | RG         |
| 1030010019A8FA00 | 103001001964FE00 | 2012-05-12       | 79N        |
| 102001001B16F200 | 102001001A977A00 | 2012-05-13       | 79N        |
| 102001001A7F8100 | 102001001BE40F00 | 2012-05-14       | 79N        |
| 1030010019CEF300 | 103001001923F100 | 2012-05-15       | 79N        |
| 10300100187CEE00 | 103001001912FE00 | 2012-05-15       | 79N        |
| 1030010018BB3D00 | 1030010019C89F00 | 2012-05-15       | PG         |
| 1030010018478400 | 1030010019A28B00 | 2012-05-17       | 79N        |
| 103001001826E500 | 1030010018413400 | 2012-05-18       | PG         |
| 102001001AD74800 | 102001001A1C9300 | 2012-05-23       | 79N        |
| 102001001B8BD000 | 102001001B48E800 | 2012-05-23       | 79N        |
| 102001001AC86C00 | 102001001B7FF500 | 2012-05-24       | RG         |
| 103001001958C200 | 1030010018C96700 | 2012-05-24       | 79N        |
| 103001001817A400 | 103001001894C500 | 2012-05-24       | 79N        |
| 102001001B772400 | 102001001B530900 | 2012-05-31       | 79N        |
| 102001001B487300 | 102001001A194A00 | 2012-06-02       | PG         |
| 102001001B348A00 | 102001001AA65A00 | 2012-06-21       | 79N        |
| 103001001BC5CD00 | 103001001A9FAA00 | 2012-07-30       | 79N        |
| 102001001D5C0C00 | 102001001C110B00 | 2012-08-22       | PG         |
| 1030010020779A00 | 103001002065CB00 | 2013-03-11       | PG         |
| 1020010022927600 | 1020010022C1C100 | 2013-03-22       | RG         |
| 102001002017E400 | 1020010020073300 | 2013-03-28       | PG         |
| 102001001F08DE00 | 1020010020612900 | 2013-03-28       | PG         |
| 1020010021CA1000 | 1020010021131A00 | 2013-03-28       | PG         |
| 10300100206DBE00 | 10300100206DCE00 | 2013-03-28       | PG         |
| 103001002103E200 | 1030010021279200 | 2013-04-01       | PG         |
| 1020010022C87200 | 1020010022D4A500 | 2013-04-02       | 79N        |
| 10300100218AAC00 | 103001002166FC00 | 2013-04-03       | PG         |
| 10300100215DCC00 | 103001002095E700 | 2013-04-03       | PG         |
| 10300100212D8600 | 10300100229C6A00 | 2013-04-03       | PG         |
| 1030010020347C00 | 10300100201D8900 | 2013-04-04       | RG         |
| 102001002055DF00 | 102001002156EC00 | 2013-04-06       | PG         |
| 1030010021894600 | 10300100214A4E00 | 2013-04-15       | RG         |
| 1030010021982B00 | 10300100208AEB00 | 2013-04-19       | 79N        |
| 1030010022366B00 | 1030010022326900 | 2013-04-20       | 79N        |
| 1020010022A92B00 | 1020010020333200 | 2013-04-20       | 79N        |
| 1030010021B10A00 | 1030010021584300 | 2013-04-23       | 79N        |
| 102001002148C500 | 1020010022D17600 | 2013-04-24       | 79N        |
| 10300100224F0E00 | 1030010022105300 | 2013-04-26       | PG         |
| 1030010022A51F00 | 1030010020420600 | 2013-05-01       | 79N        |
| 1030010022905800 | 103001002279D300 | 2013-05-05       | 79N        |

| Scene 1          | Scene 2          | Acquisition date | Ice tongue |
|------------------|------------------|------------------|------------|
| 1030010022D00B00 | 1030010023198700 | 2013-05-05       | 79N        |
| 10300100228B0100 | 1030010022088C00 | 2013-05-10       | PG         |
| 1020010021603E00 | 1020010021BF3800 | 2013-05-10       | 79N        |
| 1030010022541D00 | 10300100223CF900 | 2013-05-20       | PG         |
| 1020010024638D00 | 1020010022299900 | 2013-05-22       | 79N        |
| 10300100226FE400 | 1030010023B24100 | 2013-05-24       | 79N        |
| 1020010022489600 | 1020010020871C00 | 2013-05-24       | 79N        |
| 10200100237A7300 | 10200100212B6C00 | 2013-05-25       | 79N        |
| 1020010024CEC700 | 1020010021D7BE00 | 2013-05-26       | 79N        |
| 103001002426D600 | 1030010022ADD800 | 2013-05-26       | 79N        |
| 1020010022069600 | 1020010021CD2300 | 2013-05-26       | 79N        |
| 1030010022A95300 | 1030010023BC9900 | 2013-05-27       | 79N        |
| 1030010022D61300 | 10300100235CD200 | 2013-05-27       | 79N        |
| 10300100222A5300 | 10300100219D7900 | 2013-05-28       | 79N        |
| 103001002365A500 | 1030010023887700 | 2013-05-28       | 79N        |
| 102001002174F400 | 1020010022B2E100 | 2013-05-29       | 79N        |
| 1030010022368800 | 1030010023238900 | 2013-05-29       | 79N        |
| 10200100240DD300 | 10200100230AE100 | 2013-05-31       | PG         |
| 103001002390DF00 | 10300100234AF200 | 2013-06-27       | PG         |
| 10300100244BA500 | 1030010024AC7900 | 2013-06-28       | RG         |
| 1020010022307400 | 102001002321AC00 | 2013-07-11       | PG         |
| 1030010025150700 | 1030010025D66E00 | 2013-07-11       | RG         |
| 10200100231CC500 | 1020010023E23400 | 2013-07-19       | 79N        |
| 1030010024723400 | 103001002483B000 | 2013-07-26       | 79N        |
| 1020010024AA0300 | 102001002386E900 | 2013-07-29       | 79N        |
| 10300100248ECF00 | 1030010025734B00 | 2013-07-29       | 79N        |
| 1030010025119200 | 1030010025B3E300 | 2013-08-01       | 79N        |
| 1030010025360100 | 1030010024801900 | 2013-08-04       | 79N        |
| 10300100241C1D00 | 1030010026179800 | 2013-08-04       | PG         |
| 102001002243FF00 | 1020010024D89A00 | 2013-08-06       | 79N        |
| 1020010024B7B400 | 1020010025461C00 | 2013-08-10       | 79N        |
| 1020010023B84000 | 1020010023769E00 | 2013-08-10       | 79N        |
| 1030010025528300 | 1030010025D3D500 | 2013-08-20       | 79N        |
| 103001002665B800 | 10300100268A0400 | 2013-08-21       | PG         |
| 10300100269FCD00 | 1030010026949C00 | 2013-08-21       | PG         |
| 1020010024C54200 | 1020010024E79B00 | 2013-08-21       | 79N        |
| 1020010023DB5E00 | 1020010021062E00 | 2013-08-23       | 79N        |
| 1030010025892400 | 10300100275D2100 | 2013-09-06       | 79N        |
| 10300100261E0000 | 1030010026306600 | 2013-09-08       | PG         |
| 103001002790A300 | 10300100287D8200 | 2013-09-13       | PG         |
| 1020010024AA5600 | 1020010025577A00 | 2013-09-23       | RG         |
| 1020010024E0BF00 | 10200100250FA600 | 2013-10-03       | PG         |
| 10300100279E6200 | 1030010028AE6C00 | 2013-10-05       | PG         |
| 1030010027D25D00 | 103001002726B100 | 2013-10-08       | 79N        |
| 103001002D7E7600 | 103001002EC1C200 | 2014-03-27       | PG         |

| Scene 1          | Scene 2          | Acquisition date | Ice tongue |
|------------------|------------------|------------------|------------|
| 103001002E791500 | 10300100303A3100 | 2014-04-04       | 79N        |
| 102001002DC0DF00 | 102001002CAEC500 | 2014-04-05       | 79N        |
| 102001002D057F00 | 102001002E675800 | 2014-04-06       | 79N        |
| 1030010030AA1D00 | 103001002F63F100 | 2014-04-08       | 79N        |
| 103001002F565400 | 103001002F171B00 | 2014-04-12       | 79N        |
| 103001002E917100 | 103001002E113600 | 2014-04-13       | PG         |
| 103001002E5A0300 | 103001002F0F7F00 | 2014-04-16       | 79N        |
| 103001002F0BED00 | 103001003088B400 | 2014-04-18       | PG         |
| 1030010030616000 | 103001002E527800 | 2014-04-22       | 79N        |
| 102001002CD2F700 | 102001002D4BA300 | 2014-04-24       | 79N        |
| 103001002FC3DF00 | 103001002F9A3300 | 2014-04-25       | PG         |
| 1030010030723600 | 103001003053D200 | 2014-04-28       | PG         |
| 102001002D347E00 | 102001002BA28700 | 2014-04-28       | PG         |
| 1030010030535B00 | 1030010031495D00 | 2014-04-30       | PG         |
| 1030010030976700 | 1030010031C61200 | 2014-04-30       | 79N        |
| 103001002F731300 | 10300100305FF300 | 2014-05-01       | PG         |
| 102001002E5F6100 | 102001002EA42000 | 2014-05-01       | 79N        |
| 1030010030115F00 | 1030010031563600 | 2014-05-03       | 79N        |
| 10300100308AF800 | 103001003057C400 | 2014-05-04       | 79N        |
| 102001002C300300 | 102001002C1B5D00 | 2014-05-07       | 79N        |
| 1030010031B51300 | 1030010030B49E00 | 2014-05-08       | 79N        |
| 103001002FB40800 | 103001002F36C800 | 2014-05-08       | 79N        |
| 1030010031882100 | 1030010031AAD400 | 2014-05-12       | PG         |
| 102001002E070100 | 102001002F5D4200 | 2014-05-17       | 79N        |
| 1030010030402000 | 1030010031687B00 | 2014-05-19       | PG         |
| 102001002F22C000 | 102001002E5C9100 | 2014-05-19       | PG         |
| 1030010032287200 | 1030010032788A00 | 2014-05-23       | PG         |
| 1030010031C96D00 | 1030010032934A00 | 2014-05-26       | RG         |
| 1030010031A95C00 | 1030010032061A00 | 2014-05-28       | PG         |
| 1030010031BC2400 | 10300100300C8C00 | 2014-05-29       | RG         |
| 1030010032D67600 | 1030010031D2A100 | 2014-05-29       | 79N        |
| 102001002F5AFC00 | 102001002E77E000 | 2014-05-31       | RG         |
| 102001002FD5BD00 | 102001002E041C00 | 2014-05-31       | PG         |
| 102001002EE1B600 | 102001003022BD00 | 2014-06-01       | 79N        |
| 102001002FEA4E00 | 102001002FE18200 | 2014-06-01       | RG         |
| 102001002F5FF800 | 102001002E833400 | 2014-06-01       | PG         |
| 102001002F523600 | 102001002E26F600 | 2014-06-04       | PG         |
| 10300100333B9F00 | 1030010032415D00 | 2014-06-17       | 79N        |
| 1030010033A2D400 | 10300100335D2400 | 2014-06-20       | PG         |
| 1020010030907500 | 1020010031C91500 | 2014-06-20       | PG         |
| 1030010032543300 | 1030010032026400 | 2014-06-22       | PG         |
| 102001002F301800 | 102001002FC47C00 | 2014-06-23       | PG         |
| 103001003308BC00 | 103001003256F800 | 2014-06-24       | PG         |
| 102001002F860600 | 102001003086C700 | 2014-06-27       | PG         |
| 102001002E349300 | 10200100318E0200 | 2014-06-29       | PG         |

| Scene 1          | Scene 2          | Acquisition date | Ice tongue |
|------------------|------------------|------------------|------------|
| 10300100340AF800 | 10300100332FD900 | 2014-06-30       | PG         |
| 1020010031E8AD00 | 102001002EAAA300 | 2014-07-04       | PG         |
| 1030010033713E00 | 103001003376F100 | 2014-07-06       | PG         |
| 1030010033969600 | 10300100336CFF00 | 2014-07-06       | RG         |
| 1030010033916300 | 10300100330C6600 | 2014-07-07       | 79N        |
| 1030010034058E00 | 10300100337C6C00 | 2014-07-07       | RG         |
| 1030010034082800 | 103001003265C300 | 2014-07-16       | PG         |
| 1030010035D14700 | 1030010034735900 | 2014-08-04       | RG         |
| 1020010032536900 | 1020010031302200 | 2014-08-06       | RG         |
| 102001003231EA00 | 102001003272FB00 | 2014-08-09       | PG         |
| 102001003521BA00 | 1020010032934D00 | 2014-08-11       | RG         |
| 10300100357B5000 | 10300100369C2A00 | 2014-08-12       | PG         |
| 1020010031030D00 | 1020010032B0C600 | 2014-08-15       | RG         |
| 1020010030ABC300 | 10200100329BDB00 | 2014-08-15       | PG         |
| 10300100357F6600 | 10300100347ABF00 | 2014-08-16       | PG         |
| 1020010030B9A400 | 102001003399BB00 | 2014-08-17       | RG         |
| 10300100352C8300 | 10300100363CD400 | 2014-08-18       | PG         |
| 1020010033A3B000 | 1020010032EA1100 | 2014-08-18       | RG         |
| 1020010031C81400 | 1020010031B27F00 | 2014-08-22       | RG         |
| 1020010033464C00 | 1020010033D30300 | 2014-08-24       | PG         |
| 10300100357D8800 | 1030010034032C00 | 2014-08-25       | RG         |
| 103001003605DD00 | 10300100364E9600 | 2014-08-26       | RG         |
| 1020010030226B00 | 1020010031E37300 | 2014-08-26       | PG         |
| 1030010035C90200 | 1030010035007100 | 2014-08-27       | RG         |
| 1030010035523100 | 1030010036990C00 | 2014-08-28       | RG         |
| 10200100325FCB00 | 1020010031C32C00 | 2014-08-30       | PG         |
| 1020010034C73200 | 10200100333DEC00 | 2014-08-31       | PG         |
| 1030010036772600 | 10300100374F1700 | 2014-08-31       | RG         |
| 103001003522EB00 | 103001003682A000 | 2014-09-01       | PG         |
| 1030010036B2F500 | 1030010037803800 | 2014-09-04       | RG         |
| 1020010032DB6B00 | 1020010032585000 | 2014-09-05       | RG         |
| 1030010035BD9500 | 1030010036B7BD00 | 2014-09-06       | PG         |
| 1020010033C99300 | 1020010034CB4300 | 2014-09-18       | PG         |
| 1030010036B6FA00 | 1030010036442400 | 2014-09-20       | 79N        |
| 103001004177AE00 | 103001003EAD1D00 | 2015-03-14       | 79N        |
| 104001000971EA00 | 1040010009BC2000 | 2015-03-15       | 79N        |
| 102001003DD47D00 | 102001003B1A2900 | 2015-04-06       | 79N        |
| 10400100092E6500 | 104001000A6E9400 | 2015-04-06       | 79N        |
| 102001003D519A00 | 102001003D72DE00 | 2015-04-09       | PG         |
| 102001003D249200 | 102001003E8DB800 | 2015-04-10       | PG         |
| 1020010039C56400 | 102001003C918200 | 2015-04-10       | PG         |
| 103001003F8D5500 | 10300100405BF200 | 2015-04-11       | PG         |
| 10200100400FAB00 | 102001003E92AB00 | 2015-04-12       | PG         |
| 102001003BB33600 | 102001003C8F1200 | 2015-04-15       | PG         |
| 102001003A8CC700 | 102001003B393B00 | 2015-04-15       | 79N        |

| Scene 1          | Scene 2          | Acquisition date | Ice tongue |
|------------------|------------------|------------------|------------|
| 1040010009B1ED00 | 104001000A40EB00 | 2015-04-16       | 79N        |
| 103001004149A900 | 1030010041D88800 | 2015-04-16       | 79N        |
| 10300100406CA100 | 10300100407CC100 | 2015-04-16       | 79N        |
| 1030010040B90500 | 1030010042ABDE00 | 2015-04-16       | 79N        |
| 1030010042D7C300 | 103001003F9A2700 | 2015-04-17       | 79N        |
| 102001003C929A00 | 102001003B825400 | 2015-04-17       | 79N        |
| 103001004045D200 | 10300100405D4C00 | 2015-04-19       | PG         |
| 104001000A054400 | 104001000A02D600 | 2015-04-26       | RG         |
| 102001003C17F000 | 102001003D0AD300 | 2015-04-28       | RG         |
| 10300100418F7F00 | 1030010041BFA900 | 2015-04-28       | RG         |
| 104001000B4DB800 | 104001000AA07700 | 2015-05-03       | RG         |
| 102001003B7A5800 | 102001003C961D00 | 2015-05-05       | RG         |
| 102001003F046B00 | 102001003E171500 | 2015-05-16       | 79N        |
| 1030010043C01400 | 103001004089E100 | 2015-05-23       | 79N        |
| 104001000DB3A100 | 104001000D5D0C00 | 2015-06-17       | 79N        |
| 1030010044154700 | 10300100447C4900 | 2015-07-09       | PG         |
| 103001004423F800 | 10300100460A0300 | 2015-07-10       | PG         |
| 104001000E823E00 | 104001000E783A00 | 2015-07-17       | 79N        |
| 103001004647F000 | 1030010047831D00 | 2015-07-24       | 79N        |
